# Supplementary material for: Direct synthesis of tetraalkoxysilanes from silica and alcohols
Source: Royal Society of Chemistry journal article supplement (doi:10.1039/c6nj03897b), 2017-01-01
Supplement: c6nj03897b1.pdf [file c6nj03897b1.pdf]

## Supplementary information

### Direct Synthesis of Tetraalkoxysilane from Silica and Alcohol

Norihisa Fukaya,<sup>\*a</sup> Seong Jib Choi,<sup>a</sup> Toshio Horikoshi,<sup>a</sup> Sho Kataoka,<sup>a</sup> Akira Endo,<sup>a</sup> Hiroshi Kumai,<sup>b</sup> Minoru Hasegawa,<sup>b</sup> Kazuhiko Sato<sup>a</sup> and Jun-Chul Choi<sup>\*a</sup>

<sup>a</sup> National Institute of Advanced Industrial Science and Technology (AIST), Tsukuba Central 5, 1-1-1 Higashi, Tsukuba, Ibaraki 305-8565, Japan

<sup>b</sup> COLCOAT Co., LTD., 3-28-6 Omori-nishi, Ota-ku, Tokyo 143-0015, Japan

| Table of Contents                                 | Page |
|---------------------------------------------------|------|
| General Remarks                                   | S2   |
| Typical reaction procedure                        | S3   |
| Photograph of RHA-500 used as a starting material | S4   |

## 1. General Remarks

Silica (CARiACT Q-10) used as a starting material was supplied by Fuji Silysia Chemical Ltd. The surface area (BET), the average pore diameter (BJH), and pore volume ( $P/P_0 = 0.99$ ) were 261 m<sup>2</sup>/g, 24.5 nm, and 1.19 cm<sup>3</sup>/g, respectively. The silica was dried at 300 °C for 10 h prior to use. Rice hull ash as a natural silica source was prepared by calcination of rice hull at 500–1000 °C for 6 h. A photograph of RHA-500 was shown in Figure S3. The quartz powder and the Celite 209 purchased from Sigma-Aldrich Japan Co. (Tokyo, Japan). The SiO<sub>2</sub> content in RHA was 91–93%, determined by energy-dispersive X-ray fluorescence analysis. The molecular sieves 3A, 4A, 5A and 13X (2mm beads) were purchased from Merck Co. (Darmstadt, Germany), and dried at 300 °C for 10 h prior to use. All chemicals were reagent grade and were used without further purification.

Isothermal nitrogen adsorption/desorption measurement of SiO<sub>2</sub> was carried out at -196 °C on a BEL Japan BELSORP mini II. The reaction products were analyzed by gas chromatography (GC) and Gas chromatography–mass spectrometry (GC-MS). All volatile products were characterized by GC-MS using a Shimadzu GC-2010 gas chromatography connected to a GCMS-QP 2010 plus mass spectrometer. The yield of products were determined by GC using a Shimadzu GC-2014 equipped with a flame ionization detector.

## 2. Typical reaction procedure

Two 10 ml of stainless steel autoclaves were connected via a 1/4-inch stainless steel joint. The upper autoclave was filled by 8 g of molecular sieve 3A (2 mm beads). SiO<sub>2</sub> (0.09 g, 1.5 mmol), KOH (8.5 mg, 0.15 mmol) EtOH (8 g) were added to a bottom autoclave at room temperature under a N<sub>2</sub> atmosphere. The bottom autoclave was heated at 260 °C for 6 h. After cooling to room temperature, *p*-*tert*-butyltoluene (68 mg) was added to the reaction mixture as an internal standard to determine the yield of products using GC.

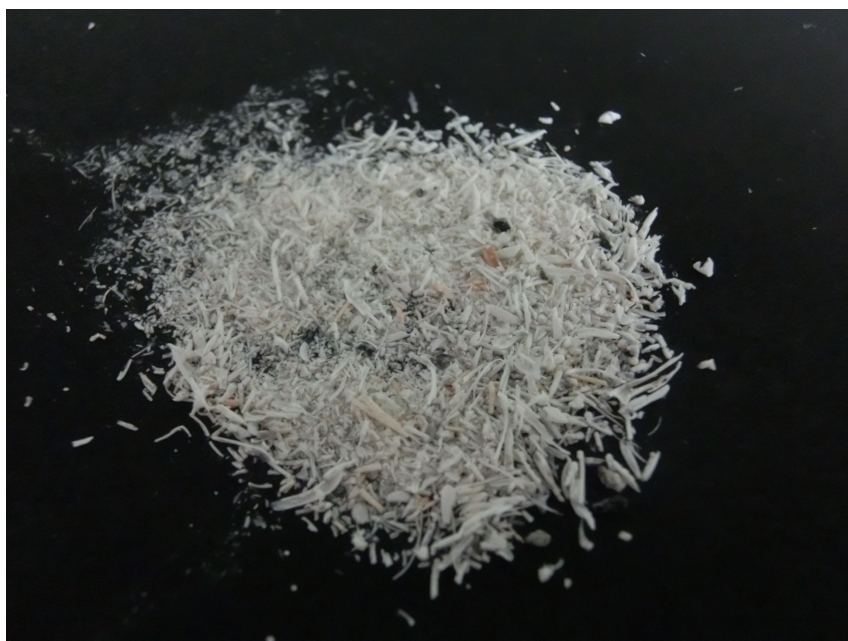

Figure S1. Photograph of RHA-500 used as a starting material.
